# Supplementary material for: An integrated meta-analysis of peripheral blood metabolites and biological functions in major depressive disorder
Source: PubMed Central journal article supplement (PMC8550972; doi:10.1038/s41380-020-0645-4), 2020-01-20

a

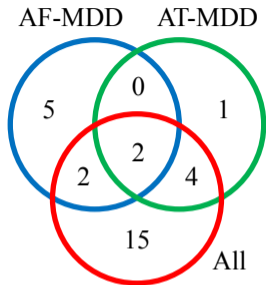

b

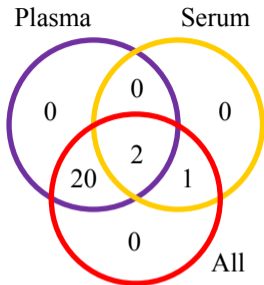

c

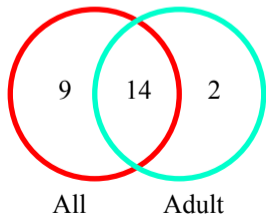

d

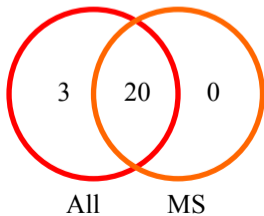

Supplement: 41380_2020_645_MOESM13_ESM.pdf [file 41380_2020_645_MOESM13_ESM.pdf]
